# Supplementary material for: The methyltransferase domain of dengue virus protein NS5 ensures efficient RNA synthesis initiation and elongation by the polymerase domain
Source: PubMed Central journal article supplement (PMC4191377; doi:10.1093/nar/gku666), 2014-09-10

## SUPPLEMENTARY FIGURES

**Figure S1: NS5 and NS5-Pol purity and stability.** (A) 12 % SDS-PAGE gel presents recombinant purified NS5 and NS5-Pol proteins and molecular marker proteins (left lane M). The molecular mass of markers is given on the left. (B)  $T_m$  values of NS5 and NS5-Pol measured by thermo-fluor based assay described in Material and Methods. (C) Guanidine hydrochloride concentration midpoints of NS5 and NS5-Pol denaturation determined as described in Materials and Methods. The experiments were done at least in triplicates.

### **Figure S2: Absence of stimulation by NS5-MTase when added as recombinant protein to NS5-Pol**

*De novo* initiation reactions leading to pppAG formation in the absence and presence of increasing concentrations of NS5-MTase. Product formation was followed with time and analyzed using PAGE. The reactions were done as given in Materials and Methods with 500  $\mu$ M ATP, 100  $\mu$ M GTP, 10  $\mu$ M T<sub>20</sub> and 2 mM MnCl<sub>2</sub>. NS5 and NS5-Pol were used without His-tag. NS5-MTase concentrations are given below the gel.

**Figure S3: Primer-dependent elongation activity of NS5, NS5 (TGGK), NS5-Pol and NS5-Pol (TGGK).** Reactions were done and analyzed using PAGE as described in Materials and Methods. (A) in the presence of MgCl<sub>2</sub>, 0.5  $\mu$ M protein, 10  $\mu$ M P<sub>10</sub>/T<sub>20</sub>, (B) in the presence of MnCl<sub>2</sub>, 0.1  $\mu$ M protein, 10  $\mu$ M P<sub>10</sub>/T<sub>20</sub>.

# Figure S1

**A.**

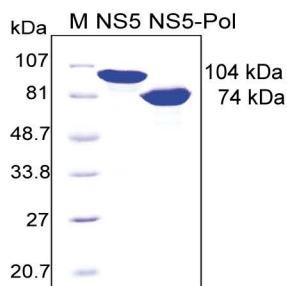

**B.**

| protein       | His-tag | $T_m$ (°C)     |
|---------------|---------|----------------|
| NS5           | +       | $38.0 \pm 0.2$ |
| NS5           | -       | $37.1 \pm 0.1$ |
| NS5(TGGK)     | +       | $37.7 \pm 0.1$ |
| NS5-Pol       | +       | $40.1 \pm 0.2$ |
| NS5-Pol       | -       | $40.1 \pm 0.1$ |
| NS5-Pol(TGGK) | +       | $39.8 \pm 0.0$ |
| NS5-MTase     | +       | $41.6 \pm 0.0$ |

**C.**

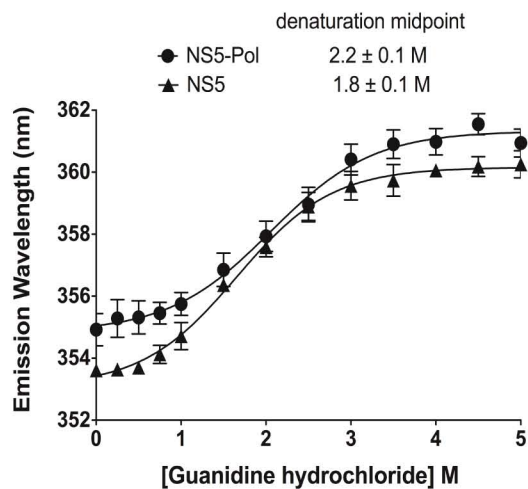

**Figure S2**

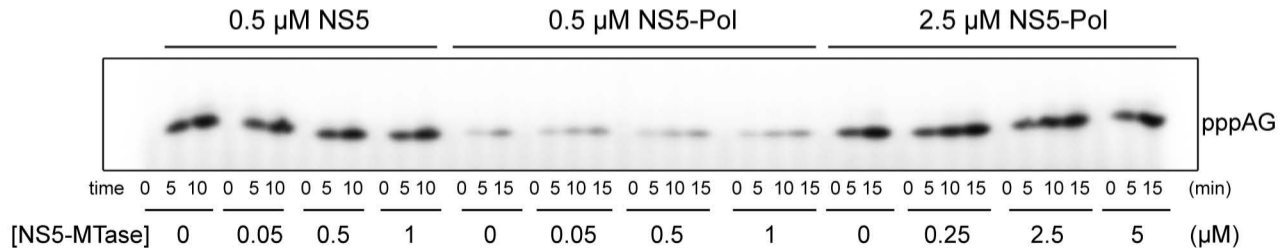

# Figure S3

## A. $Mg^{2+}$

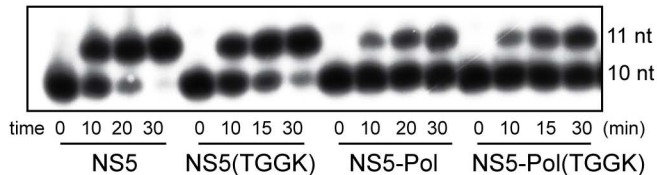

## B. $Mn^{2+}$

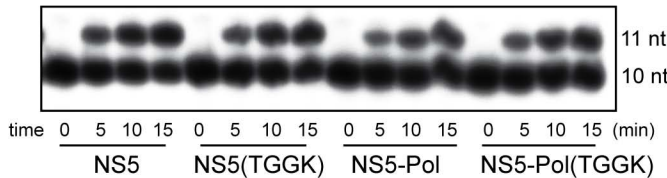

Supplement: supp_gku666_nar-01226-r-2014-File008.pdf [file supp_gku666_nar-01226-r-2014-File008.pdf]
